# Supplementary material for: Traditional Olive Tree Varieties in Alto Aragón (NE Spain): Molecular Characterization, Single-Varietal Oils, and Monumental Trees
Source: MDPI journal article supplement (doi:10.3390/agriculture13122204), 2023-11-27
Supplement: s1 [file s1]

# Molecular Characterization and Opportunities for the Valorization of Traditional Olive Tree Varieties in Alto Aragón (NE Spain)

Alfredo Serreta-Oliván, Rubén Sancho-Cohen, A. Cristina Sánchez-Gimeno, Pablo Martín-Ramos, José Antonio Cuchí-Oterino, and José Casanova-Gascón

## SUPPLEMENTARY MATERIAL

**Table S1.** Results of the survey of plant material according to the different localities; the olive trees selected for DNA analysis; results of the analysis (BGMO); interesting varieties (new genotype) and observations.

| Location | Local Name            | DNA Analysis | BGMO                  | Provisional New Name of Genotype | Comments              |
|----------|-----------------------|--------------|-----------------------|----------------------------------|-----------------------|
| Abiego   | Alcampelina de Abiego | No           |                       |                                  |                       |
|          | Aceitunero            | Yes          | Changlot Real         |                                  | Variety from Valencia |
|          | Albas                 | No           |                       |                                  |                       |
|          | Blancal               | Yes          | Bolvino               |                                  | Variety from Aragón   |
|          | Gordera de Abizanda   | Yes          | Nación                |                                  | Variety from Huesca   |
| Abizanda | Royeta de Abizanda    | Yes          | Royeta de Abizanda    |                                  | Variety from Huesca   |
|          | Royeta de Abizanda    | Yes          | Royeta de Abizanda    |                                  | Variety from Huesca   |
|          | Cerruda               | Yes          | Cerruda de Liesa      |                                  | Variety from Huesca   |
|          | Gordal                | No           |                       |                                  |                       |
|          | Aceitunero_B          | Yes          | Aceitunero-2249       |                                  | Variety from La Rioja |
| Aínsa    | Rañinera              | No           |                       |                                  |                       |
|          | Rañinera              | No           |                       |                                  |                       |
| Albelda  | Negreta               | Yes          | Manzanilla de Sevilla |                                  |                       |
|          | Seira                 | Yes          | To be assigned*       | Seira                            | New variety           |
|          | Alquecerana           | Yes          | To be assigned*       | Alquecerana                      | New variety           |
|          | Mochuto               | Yes          | Mochuto               |                                  | Variety from Huesca   |
|          | Panseñera             | Yes          | Panseña               |                                  |                       |
| Alquézar | Panseña Fina          | Yes          | To be assigned*       | Panseña fina                     | New variety           |
|          | Albás                 | Yes          | Verdal del Pallars    |                                  | Variety from Cataluña |
|          | Neral                 | Yes          | Neral                 |                                  | Variety from Huesca   |
| Aniés    | Olivo Celia           | Yes          | To be assigned*       | Olivonero de Ayerbe              | New variety           |

| Location            | Local Name                  | DNA Analysis | BGMO               | Provisional New Name of Genotype | Comments            |
|---------------------|-----------------------------|--------------|--------------------|----------------------------------|---------------------|
| Apiés               | Olivonero de Apiés          | No           |                    |                                  |                     |
|                     | Olivonero                   | No           |                    |                                  |                     |
| Artasona            | Alía                        | Yes          | Alía               |                                  | Variety from Huesca |
|                     | Cerruda de Artasona         | Yes          | Cerruda de Olvena  |                                  | Variety from Huesca |
| Asque               | Royeta Asque                | Yes          | Royeta de Asque    |                                  | Variety from Huesca |
|                     | Royeta                      | Yes          | Royeta de Asque    |                                  | Variety from Huesca |
|                     | Cerecera                    | Yes          | Royeta de Asque    |                                  | Variety from Huesca |
|                     | Bastarda                    | Yes          | To be assigned*    | Bastarda                         | New variety         |
| Ayerbe              | Negral 1                    | Yes          | Royal de Calatayud |                                  | Variety from Aragon |
|                     | Olivonero de Ayerbe         | Yes          | To be assigned*    | Olivonero de Ayerbe              | New variety         |
|                     | Negral                      | No           |                    |                                  |                     |
|                     | Olivonero                   | Yes          | Royal de Calatayud |                                  | Variety from Aragon |
| Azlor               | Olivera del Monte del Barón | No           |                    |                                  |                     |
|                     | Roya                        | No           |                    |                                  |                     |
|                     | Neral                       | No           |                    |                                  |                     |
| Baells              | Royeta Baells               | Yes          | To be assigned*    | Royeta de Baells                 | New variety         |
| Banastón            | Rañinera                    | No           |                    |                                  |                     |
|                     | Rañinera                    | No           |                    |                                  |                     |
|                     | Rañinera                    | No           |                    |                                  |                     |
| Barbuñales          | Verdeña                     | No           |                    |                                  |                     |
|                     | Verdeña                     | No           | Royal de Calatayud |                                  | Variety from Aragon |
| Benabente de Aragón | Biecuda de Benavente        | Yes          | Cerruda de Liesa   |                                  | Variety from Huesca |
| Berbegal            | Verto                       | Yes          | To be assigned*    | Verto                            | New variety         |
| Bierge              | Negral de Bierge            | Yes          | Negral de Bierge   |                                  | Variety from Huesca |
| Binefar             | Manzanilla                  | Yes          | Hojiblanca         |                                  |                     |
| Boltaña             | Minutera                    | Yes          | To be assigned*    | Minutera de Boltaña              | New variety         |
|                     | Cerruda                     | Yes          | Neral              |                                  | Variety from Huesca |
|                     | Acebuche_1                  | Yes          | To be assigned*    | Acebuche_1                       | New variety         |
|                     | Acebuche_2                  | Yes          | To be assigned*    | Acebuche_2                       | New variety         |
| Buera               | Albareta                    | Yes          | Albareta           |                                  | Variety from Huesca |
|                     | Sebastian                   | Yes          | Nación             |                                  | Variety from Huesca |

| Location         | Local Name             | DNA Analysis | BGMO                | Provisional New Name of Genotype | Comments              |
|------------------|------------------------|--------------|---------------------|----------------------------------|-----------------------|
|                  | Olivo de La Iglesia    | Yes          | To be assigned*     | Buera_1                          | New variety           |
|                  | Falsa Blancal          | Yes          | To be assigned*     | Buera_2                          | New variety           |
| Capella          | Biecuda de Capella     | Yes          | To be assigned*     | Biecuda de Capella               | New variety           |
| Castillazuelo    | Neral                  | No           |                     |                                  |                       |
|                  | Albás                  | No           |                     |                                  |                       |
| Colungo          | Olivera de Nadal       | Yes          | To be assigned*     | Olivera de Nadal                 | New variety           |
| Cregenzan        | Gordal Cregenzan       | Yes          | Gordal de Somontano |                                  | Variety from Huesca   |
| Enate            | Enate                  | Yes          | Royeta de Asque     |                                  | Variety from Huesca   |
| Escanilla        | Tempraneta             | Yes          | Bolvino             |                                  | Variety from Aragon   |
|                  | Cerruda 1              | No           |                     |                                  |                       |
|                  | Desconocida            | Yes          | To be assigned*     | Escanilla                        | New variety           |
|                  | Desconocida 2          | No           |                     |                                  |                       |
|                  | Desconocida 3 San Juan | No           |                     |                                  |                       |
|                  | Injerto                | Yes          | Caspolina           |                                  | Variety from Aragon   |
|                  | Mochuda                | Yes          | Cerruda de Liesa    |                                  | Variety from Huesca   |
|                  | Sevillano              | Yes          | To be assigned*     | Sevillano_1                      | New variety           |
|                  | Tempraneta             | No           |                     |                                  |                       |
|                  | Verderola              | Yes          | To be assigned*     | Verdolera                        | New variety           |
| Estadilla        | Nación                 | Yes          | Nación              |                                  | Variety from Huesca   |
|                  | Piga                   | Yes          | Piga                |                                  | Variety from Huesca   |
| Guaso            | Guaso1                 | Yes          | Rañinera            |                                  | Variety from Huesca   |
| Hoz de Barbastro | Castanero              | Yes          | To be assigned*     | Castanero                        | New variety           |
|                  | Dulce                  | Yes          | Neral               |                                  | Variety from Huesca   |
|                  | Picaceta               | Yes          | Morcaire            |                                  | Variety from Cataluña |
|                  | Royeta de Hoz          | Yes          | To be assigned*     | Royeta de Hoz                    | New variety           |
|                  | Ley de Coronas         | No           |                     |                                  |                       |
| Huesca           | Olivo de La Escuela    | Yes          | Royal de Calatayud  |                                  | Variety from Aragon   |
| Ibieca           | Picudo de Ibieca       | Yes          | To be assigned*     | Picudo de Ibieca                 | New variety           |
| Ipiés            | Monasterio Fanlo 1     | Yes          | Royal de Calatayud  |                                  | Variety from Aragon   |
|                  | Monasterio Fanlo 2     | Yes          | Royal de Calatayud  |                                  | Variety from Aragon   |
| Labata           | Minutera de Labata     | Yes          | To be assigned*     | Minutera de Labata               | New variety           |
|                  | Minutera               | No           |                     |                                  |                       |

| Location           | Local Name            | DNA Analysis | BGMO                  | Provisional New Name of Genotype | Comments            |
|--------------------|-----------------------|--------------|-----------------------|----------------------------------|---------------------|
|                    | Picudo de Labata      | Yes          | Picudo de Labata      |                                  | Variety from Huesca |
|                    | Rosal                 | Yes          | To be assigned*       | Rosal                            | New variety         |
|                    | Sevillano de Labata   | Yes          | Picual                |                                  |                     |
| Lamata             | Blancal Lamata        | Yes          | Bolvino               |                                  | Variety from Aragon |
|                    | Desconocida 1         | Yes          | Royal de Calatayud    |                                  | Variety from Aragon |
|                    | Desconocida 2         | Yes          | Bolvino               |                                  | Variety from Aragon |
| Lascuarre          | Biequeruda            | Yes          | Biequeruda            |                                  | Variety from Huesca |
| Liesa              | Cerruda               | Yes          | Cerruda de Liesa      |                                  | Variety from Huesca |
|                    | Negral                | No           |                       |                                  |                     |
| Loscertales        | Blancal               | No           |                       |                                  |                     |
|                    | Roya                  | No           |                       |                                  |                     |
| Murillo de Gállego | Olivonero de Murillo  | Yes          | To be assigned*       | Olivonero de Murillo             | New variety         |
|                    | Alcampelina           | Yes          | Verdiell              |                                  |                     |
|                    | Alquecerana           | Yes          | Nación                |                                  | Variety from Huesca |
| Peralta de Alcofea | Bravo Peralta         | Yes          | Royal de Calatayud    |                                  | Variety from Aragon |
| Peralta de la Sal  | Apegalosa             | No           |                       |                                  |                     |
|                    | Blancal               | No           |                       |                                  |                     |
|                    | Manzanilla            | No           |                       |                                  |                     |
| Piracés            | Verdeña de Piracés    | No           |                       |                                  |                     |
| Pueyo de Araguás   | Común_1               | Yes          | Rañinera              |                                  | Variety from Huesca |
|                    | Común_2               | Yes          | Neral                 |                                  | Variety from Huesca |
|                    | Pueyo_Desconocida     | No           |                       |                                  |                     |
|                    | Distinta_Pueyo        | Yes          | Rañinera              |                                  | Variety from Huesca |
|                    | Desconocida 2         | Yes          | To be assigned*       | Pueyo de Araguás                 | New variety         |
| Radiquero          | Minutera de Radiquero | No           |                       |                                  |                     |
|                    | Minutera de Viña      | Yes          | To be assigned*       | Minutera de Viña                 | New variety         |
| Secastilla         | Biequeruda            | No           |                       |                                  |                     |
| Riglos             | Verdeña               | Yes          | Rañinera              |                                  | Variety from Huesca |
| Roda               | Olivonero_1           | No           |                       |                                  |                     |
|                    | Olivonero_2           | No           |                       |                                  |                     |
| Salas              | Gordal de Salas       | Yes          | Manzanilla de Sevilla |                                  |                     |

| Location                 | Local Name                 | DNA Analysis | BGMO                   | Provisional New Name of Genotype | Comments              |
|--------------------------|----------------------------|--------------|------------------------|----------------------------------|-----------------------|
| Santa Eulalia de Gállego | Casa Valentín              | Yes          | To be assigned*        | Olivonero de Ayerbe              | New variety           |
|                          | Olivonero de Santa Eulalia | Yes          | Gordal de Somontano    |                                  | Variety from Huesca   |
|                          | Olivonero de Ayerbe        | No           |                        |                                  |                       |
|                          | Olivonero Alastuey         | Yes          | To be assigned*        | Olivonero Alastuey               | New variety           |
|                          | Verdeña                    | Yes          | Royal de Calatayud     |                                  | Variety from Aragon   |
| Sariñena                 | Dulcera                    | Yes          | To be assigned*        | Dulcera                          | New variety           |
| Sopeira                  | Alargada                   | Yes          | Royal de Calatayud     |                                  | Variety from Aragon   |
|                          | Casa Frasco                | Yes          | Verdal del Pallars     |                                  | Variety from Cataluña |
|                          | Escario                    | Yes          | To be assigned*        | Escario                          | New variety           |
|                          | Grosal_Raïniera            | Yes          | Raïniera               |                                  | Variety from Huesca   |
|                          | Mugrón                     | Yes          | Raïniera               |                                  | Variety from Huesca   |
|                          | Salenca                    | Yes          | To be assigned*        | Salenca                          | New variety           |
|                          | Choricera                  | Yes          | Verdeal Tras-Os-Montes |                                  | Variety from Portugal |

\*The new variety has not yet been assigned an accession number.

**Table S2.** Biallelic SNP set of 96 EST-SNP Markers for 92 samples and two positive controls (C+\_19-5 [Picual] and C+\_F8A3 [Frantoio]). NTC abbreviation indicates "no template control". Bold italic letters indicate new.

[See separate Excel file]

**Table S3.** Sorted Multilocus Genotypes. Numbers correspond to A (1), C (2), G (3), T (4) and missing data (-1). Samples that shared the same genotype were clustered into the same genotype ID. Asterisks indicate samples with missing data. Bold italic letters indicate new varieties.

| Genotype ID           | Sample ID               | Genotype                                                                                                                                                                                                   | No. of Samples |
|-----------------------|-------------------------|------------------------------------------------------------------------------------------------------------------------------------------------------------------------------------------------------------|----------------|
| Bolvino               | Bolvino_1               | 334444221222133313331123334413134222111342112242131313221133114233112233444222444413222343331333131411224422<br>23224413112344331144143311112222131243331122224242221142114242424211224433424222213g       | 4              |
|                       | Bolvino_2               | 334444221222133313331123334413134222111342112242131313221133114233112233444222444413222343331333131411224422<br>23224413112344331144143311112222131243331122224242221142114242424211224433424222213g       |                |
|                       | Bolvino_3               | 334444221222133313331123334413134222111342112242131313221133114233112233444222444413222343331333131411224422<br>23224413112344331144143311112222131243331122224242221142114242424211224433424222213g       |                |
|                       | Bolvino_4               | 334444221222133313331123334413134222111342112242131313221133114233112233444222444413222343331333131411224422<br>23224413112344331144143311112222131243331122224242221142114242424211224433424222213g       |                |
| Cerruda de Liesa      | Cerruda de Liesa_1      | 33441442124433331313113333141313222133342114242131333221144134413114211442242444413423344131113131411224322<br>23234433133342131342113313134222131243431122422242221322134244442134242234244222211g        | 4              |
|                       | Cerruda de Liesa_2*     | 3344144212443333131311333314131322213334211424213133322114413-1-<br>113114211442242444413423344131113131411224322232344331333421313421133131342221312434311224222422213221342444<br>442134242234244222211g |                |
|                       | Cerruda de Liesa_3      | 33441442124433331313113333141313222133342114242131333221144134413114211442242444413423344131113131411224322<br>23234433133342131342113313134222131243431122422242221322134244442134242234244222211g        |                |
|                       | Cerruda de Liesa_4      | 33441442124433331313113333141313222133342114242131333221144134413114211442242444413423344131113131411224322<br>23234433133342131342113313134222131243431122422242221322134244442134242234244222211g        |                |
| Gordal de Somontano   | Gordal de Somontano_1   | 234214421122133311131323331413134222131342114442331333221143134213134413442242444413222244131113131413424442<br>232344331133223311421133131322421312434313422242424213421342424442134242232244224211g      | 2              |
|                       | Gordal de Somontano_2   | 234214421122133311131323331413134222131342114442331333221143134213134413442242444413222244131113131413424442<br>232344331133223311421133131322421312434313422242424213421342424442134242232244224211g      |                |
| Manzanilla de Sevilla | Manzanilla de Sevilla_1 | 234211421142133313131123131433114211131344114222331111211331342131142134442221442114222431311131111424342<br>333344131333423333441143131344221112434313424442422213221342424442134242232242422233g         | 2              |
|                       | Manzanilla de Sevilla_2 | 234211421142133313131123131433114211131344114222331111211331342131142134442221442114222431311131111424342<br>333344131333423333441143131344221112434313424442422213221342424442134242232242422233g         |                |
| Nación                | Nación_1                | 2344144222421333111313233314133322213134411422233131112114413423311443344224444413222344131113134433224442<br>23334413132221311421433111142221322434413224442424213421342224242134242234244224213g         | 4              |
|                       | Nación_2                | 2344144222421333111313233314133322213134411422233131112114413423311443344224444413222344131113134433224442<br>23334413132221311421433111142221322434413224442424213421342224242134242234244224213g         |                |
|                       | Nación_3                | 2344144222421333111313233314133322213134411422233131112114413423311443344224444413222344131113134433224442<br>23334413132221311421433111142221322434413224442424213421342224242134242234244224213g         |                |
|                       | Nación_4                | 2344144222421333111313233314133322213134411422233131112114413423311443344224444413222344131113134433224442<br>23334413132221311421433111142221322434413224442424213421342224242134242234244224213g         |                |

|                     |                                                                                                                                                                                                  |                                                                                                                                                                                                  |   |
|---------------------|--------------------------------------------------------------------------------------------------------------------------------------------------------------------------------------------------|--------------------------------------------------------------------------------------------------------------------------------------------------------------------------------------------------|---|
| Neral               | Neral_1                                                                                                                                                                                          | 23421422114233331113111223314133342221333421142423333132213441344131344134422424444114222441111331314112244223334433132242331144113313112222131243431342444242213221342444442134242232244224213g | 4 |
|                     | Neral_2                                                                                                                                                                                          | 23421422114233331113111223314133342221333421142423333132213441344131344134422424444114222441111331314112244223334433132242331144113313112222131243431342444242213221342444442134242232244224213g |   |
|                     | Neral_3                                                                                                                                                                                          | 23421422114233331113111223314133342221333421142423333132213441344131344134422424444114222441111331314112244223334433132242331144113313112222131243431342444242213221342444442134242232244224213g |   |
|                     | Neral_4                                                                                                                                                                                          | 23421422114233331113111223314133342221333421142423333132213441344131344134422424444114222441111331314112244223334433132242331144113313112222131243431342444242213221342444442134242232244224213g |   |
| Olivonero de Ayerbe | Olivonero de Ayerbe_1                                                                                                                                                                            | 3342144212421313131313233344333342221313221144221333131213331342131322334422221444132222443311131314134244223334413112222131344113311112242131243431322444242213221342444242134242234244222211g  | 3 |
|                     | Olivonero de Ayerbe_2                                                                                                                                                                            | 3342144212421313131313233344333342221313221144221333131213331342131322334422221444132222443311131314134244223334413112222131344113311112242131243431322444242213221342444242134242234244222211g  |   |
|                     | Olivonero de Ayerbe_3                                                                                                                                                                            | 3342144212421313131313233344333342221313221144221333131213331342131322334422221444132222443311131314134244223334413112222131344113311112242131243431322444242213221342444242134242234244222211g  |   |
|                     | Rañinera_1                                                                                                                                                                                       | 23441442124233331313112333441313222213334411442213331322134413423311421344224244441342224433111313441322442233344131122421313441433131322221322434311424244422213421342224442134242234244224211g |   |
| Rañinera_2          | 23441442124233331313112333441313222213334411442213331322134413423311421344224244441342224433111313441322442233344131122421313441433131322221322434311424244422213421342224442134242234244224211g |                                                                                                                                                                                                  |   |
| Rañinera_3          | 23441442124233331313112333441313222213334411442213331322134413423311421344224244441342224433111313441322442233344131122421313441433131322221322434311424244422213421342224442134242234244224211g |                                                                                                                                                                                                  |   |
| Rañinera_4          | 23441442124233331313112333441313222213334411442213331322134413423311421344224244441342224433111313441322442233344131122421313441433131322221322434311424244422213421342224442134242234244224211g |                                                                                                                                                                                                  |   |
| Rañinera_5          | 23441442124233331313112333441313222213334411442213331322134413423311421344224244441342224433111313441322442233344131122421313441433131322221322434311424244422213421342224442134242234244224211g |                                                                                                                                                                                                  |   |
| Rañinera_6          | 23441442124233331313112333441313222213334411442213331322134413423311421344224244441342224433111313441322442233344131122421313441433131322221322434311424244422213421342224442134242234244224211g |                                                                                                                                                                                                  |   |
| Royal de Calatayud  | Royal de Calatayud_1                                                                                                                                                                             | 23441442222331311133322331413334212133342114222331311121333134213134433442244444411423344331113334413424342233344331322421313441433131122421322434311224444424213221342444242134242234244224211g | 8 |
|                     | Royal de Calatayud_2                                                                                                                                                                             | 23441442222331311133322331413334212133342114222331311121333134213134433442244444411423344331113334413424342233344331322421313441433131122421322434311224444424213221342444242134242234244224211g |   |
|                     | Royal de Calatayud_3                                                                                                                                                                             | 23441442222331311133322331413334212133342114222331311121333134213134433442244444411423344331113334413424342233344331322421313441433131122421322434311224444424213221342444242134242234244224211g |   |
|                     | Royal de Calatayud_4                                                                                                                                                                             | 23441442222331311133322331413334212133342114222331311121333134213134433442244444411423344331113334413424342233344331322421313441433131122421322434311224444424213221342444242134242234244224211g |   |
|                     | Royal de Calatayud_5                                                                                                                                                                             | 23441442222331311133322331413334212133342114222331311121333134213134433442244444411423344331113334413424342233344331322421313441433131122421322434311224444424213221342444242134242234244224211g |   |
|                     | Royal de Calatayud_6                                                                                                                                                                             | 23441442222331311133322331413334212133342114222331311121333134213134433442244444411423344331113334413424342233344331322421313441433131122421322434311224444424213221342444242134242234244224211g |   |
|                     | Royal de Calatayud_7                                                                                                                                                                             | 23441442222331311133322331413334212133342114222331311121333134213134433442244444411423344331113334413424342233344331322421313441433131122421322434311224444424213221342444242134242234244224211g |   |

|                    |                       |                                                                                                                                                                                                            |   |
|--------------------|-----------------------|------------------------------------------------------------------------------------------------------------------------------------------------------------------------------------------------------------|---|
|                    | Royal de Calatayud_8  | 23441442222331311133322331413334212133342114222331311121333134213134433442244444411423344331113334413424342<br>233344331322421313441433131122421322434311224444424213221342444242134242234244224211g       |   |
|                    | Royal de Calatayud_9  | 23441442222331311133322331413334212133342114222331311121333134213134433442244444411423344331113334413424342<br>233344331322421313441433131122421322434311224444424213221342444242134242234244224211g       |   |
| Royeta de Abizanda | Royeta de Abizanda_1* | 234214221122333313331122334433132212131122114242133313121133134433114233444422144213222343131333131411224322<br>2322443311224213134414331111442211113343134222424242132213224242421342423322442222-1-1g    | 2 |
|                    | Royeta de Abizanda_2  | 234214221122333313331122334433132212131122114242133313121133134433114233444422144213222343131333131411224322<br>232244331122421313441433111144221111334313422242424213221322424242134242332244222213g      |   |
| Royeta de Asque    | Royeta de Asque_1     | 224444221222131313331333331411114222333342114242333313221133114211114233422242144413422243111333334411444422<br>232344331322421311421433131122443312434311224242422211421344422242112244334442422211g      | 3 |
|                    | Royeta de Asque_2     | 224444221222131313331333331411114222333342114242333313221133114211114233422242144413422243111333334411444422<br>232344331322421311421433131122443312434311224242422211421344422242112244334442422211g      |   |
|                    | Royeta de Asque_3     | 224444221222131313331333331411114222333342114242333313221133114211114233422242144413422243111333334411444422<br>232344331322421311421433131122443312434311224242422211421344422242112244334442422211g      |   |
| Verdal de Pallars  | Verdal del Pallars_1  | 2242142211423313131333233344331122123333421122441133111211441344331344134422224444112223431313131413224422<br>232344131123421313441433131322221322433313424242422213421342224242134242232242222211g        | 2 |
|                    | Verdal del Pallars_2  | 2242142211423313131333233344331122123333421122441133111211441344331344134422224444112223431313131413224422<br>232344131123421313441433131322221322433313424242422213421342224242134242232242222211g        |   |
| Acebuche_1         | Acebuche_1            | 224444421142131311331323331411112222111342114442133313221144132213114213442242144233442243331313134413424422<br>223344131122221313421133131342421322434413444242422213421144424242114242234444222211g      | 1 |
| Acebuche_2         | Acebuche_2            | 3344112211423333131311221314133322233334211424213331122334433423311223344222214421322243331111134411424322<br>22234413132244133344443111344221322443311222242442211421344424222114244334242424211g         | 1 |
| Aceitunero-2249    | Aceitunero-2249       | 334414421222113311331333331411134222111142112242331113221133134233114233442242444433223343331133134413224442<br>232344131323423311441133111122221322434311224244422213441322424244132242234244222213g      | 1 |
| Albareta           | Albareta              | 3344442212221333113313233314333422233132211422233111121144334211134433442242444413222344131311131413224422<br>222344131122423313421143131122221322433313224444424213421142444442134242334244224213g        | 1 |
| Alía               | Alía                  | 23441422122213131113132333443313221213334211224213131322113313423313441344224444411422244331111134413224422<br>233344131322421311421443131122221322434311222242424213221342424442134242232244222213g       | 1 |
| Alquecerana        | Alquecerana           | 234444221122111311131123334413332222131342112222331313221143134213114433442242444413222343111313131411424422<br>232244111122443311421143111122421322443313224244422211441142444242112244334242224213g      | 1 |
| Bastarda           | Bastarda              | 2342142212223313113313233314111142221333421142223333322113311441313421342224244441342224311133134411444422<br>332344331123423311421133111322443312434313422242422213421144444242132244234242222211g        | 1 |
| Biecuda Capella*   | Biecuda Capella*      | 334214221242133311133322334433132222131342114242-1-<br>11333221133134233114233444222144413222343331333134413224342232344331123421313444443111222213114343132222424<br>24213221142422242134242234244222211g | 1 |
| Biequeruda         | Biequeruda            | 224411421244333311131123334413134211131342114444111333121133134433112233442244144411422344131313331411424422<br>33334413132222131342113311132242131243441142424444221322134244424413424222244422211g       | 1 |
| Buera_1            | Buera_1               | 33441422112211331313132233141113442211134211444233333221343114211114411444242444213422244131313334413424444<br>22334433132342331342114311112242131144433344424442421322332242442213442222244424413g        | 1 |



|                             |                             |                                                                                                                                                                                                              |   |
|-----------------------------|-----------------------------|--------------------------------------------------------------------------------------------------------------------------------------------------------------------------------------------------------------|---|
| <i>Buera_2</i>              | <i>Buera_2</i>              | 334414221222133311113323334433134212131342114242131313121143134233114213442242444413222344131113331413224442<br>33334433112342111142113311112222332243431142424222211441142224244132244232242224211g         | 1 |
| Caspolina                   | Caspolina                   | 234411421242333313131122131433134222113342132242331333221133134233134413444242144411222244131111334433423322<br>23224433132244331142144311132222332243331322424222211221122444442114242232242424211g         | 1 |
| <i>Castanero</i>            | <i>Castanero</i>            | 334444422222333313133323331413334222111342112242131313221143134413114233422242444213423343111333114413224442<br>333343331123421313421433111342221322434313424422422213421342424242132242232242224211g        | 1 |
| Cerruda de Olvena           | Cerruda de Olvena           | 334214422242131311133322334433334222131322114242133313121143134233134233442222144413222344331113131433224422<br>233344131322421313441133111122221322434413424242424213221342424242134242232244222213g        | 1 |
| Changlot Real*              | Changlot Real*              | 334214421142131313132313143313422213134211222233131312113311441311223342222444211442343111111331411423344<br>232344131323443333421143111344423312-1-1431342422222213441142424442132244232242424413g          | 1 |
| <i>Dulcera</i>              | <i>Dulcera</i>              | 22421444124411131133132313111333421211332211224213333322134313221311423342444214441142224333111111111443342<br>23224311132242131122444313134242331143431322244224213421344424222114444332244424411g          | 1 |
| <i>Escanilla</i>            | <i>Escanilla</i>            | 224411421242131111313333333141311421133134213424413331111333114213334213442242144411423343113313131433224322<br>3322441313234413114414331311222211244431122444242221142134242224213222234242422211g          | 1 |
| <i>Escario</i>              | <i>Escario</i>              | 334214221142131313131323331413134212133344114242331313121343134213114413442222144411423344131111131433224422<br>23334433112242131144114311112222132243441342424242221342134242444213424223244222211g         | 1 |
| Hojiblanca                  | Hojiblanca                  | 33421142114233131313332333443311421213134413222233111121133134413114433424222144233443344111313331413423344<br>233343133333423333441143111142221112434413424442422213221342224242134242232242424211g         | 1 |
| <i>Minutera Boltaña*</i>    | <i>Minutera Boltaña*</i>    | 2344144212221333113313231314331322113333221322423311132213431144131342-1-<br>14242421442134223433313133314134233442223433313224413134214431313222213124444132244442223322334244424213424<br>4232242422211g   | 1 |
| <i>Minutera de Labata*</i>  | <i>Minutera de Labata*</i>  | 2342144411421313113313231314111144121333441342423333131213443342111342-1-<br>142424414421142224411331133141344434223234413132342-1-<br>11322144313112242131244443342424222421342134444222211424233222224211g | 1 |
| <i>Minutera de Viña</i>     | <i>Minutera de Viña</i>     | 23421442114211131313112313141113222213134411424233131322133333221111423344424444211222244111111131413424342<br>232344111322443313221143111122421112444333424442424211421342442222114242334444222213g         | 1 |
| Mochuto                     | Mochuto                     | 334414421244331311133333331433334212133342114222331313121133134413132233442244144411222344131113131413424342<br>233344131123221313421143111122421312433313424422422213221342424442134242232244222211g        | 1 |
| Morcaire                    | Morcaire                    | 334414221122333313331323131433334212131342114422131111221343134413114413444242144211423344111133131413424422<br>233344111323421313421133131122421312433311222242422213221342224444132242332242424211g        | 1 |
| Negral de Bierge            | Negral de Bierge            | 334444221242133333331123334411334222133342114242131311221143134233112233442222444413222243131333114413424422<br>232244111123423311441133111142423322434313224244422211441144422242112244334244224211g        | 1 |
| <i>Olivera de Nadal</i>     | <i>Olivera de Nadal</i>     | 234214221142133311111123334413334222131344112242333311221143114213114433442242444411222343111113334411424422<br>33234413132244331142113313112242331244331342424222213421342444242132242234242224411g         | 1 |
| <i>Olivonero Alastuey*</i>  | <i>Olivonero Alastuey*</i>  | 23441444124211131133132313111132212131144114242133313221343132213112233444242-1-<br>142134223433333131314134243442322431313342331342-1-<br>143131322423311433313442244424213421344444222114444232242424211g  | 1 |
| <i>Olivonero de Murillo</i> | <i>Olivonero de Murillo</i> | 2342444212421311113333231314133322221134211224213331322113313223311423344422244441122234333131313111444342<br>332244111123423311421433111122443311433313424244422211421344424422114444234242224211g          | 1 |

|                         |                         |                                                                                                                                                                                                             |   |
|-------------------------|-------------------------|-------------------------------------------------------------------------------------------------------------------------------------------------------------------------------------------------------------|---|
| <i>Panseña Fina</i>     | <i>Panseña Fina</i>     | 2342114222213131311332333111113221213334211222233331122133313441311443344224444411423344131311131411424342<br>22234333322441311441433111122421322444313224244422213221142442222112242234244424211g          | 1 |
| Panseñera               | Panseñera               | 2344444212221311133333233314111342221333421142421333112211431342111142134422424444132222431313134411444422<br>232344131123423311221133111122443322434313224244422211421144424242112244334242224211g         | 1 |
| Picual                  | Picual                  | 334414421222133313131322334433134211131322114444111133121343134413114233422242114213442244131313331413424342<br>232344131123421133441143131342221312433313424442424213423342424442134242232242424213g       | 1 |
| <i>Picudo de Ibieca</i> | <i>Picudo de Ibieca</i> | 234211222242131311333322331413334212331342114222333313121144114233134233442242444411422344131133334413424344<br>223344331323221313441133131122421122334313224444444213223344444242134444234244222211g       | 1 |
| Picudo de Labata*       | Picudo de Labata*       | 3342142212441333111313233314333342221313-1-<br>111224233131312134313421311221344224214441322234413111333141342444223334433112322131144114311132242131243441<br>3224442422213221342424242134242234244222211g | 1 |
| Piga                    | Piga                    | 22444444222233331313332333111113421213334211422233131311133134413134233442242144411222344131311334413224342<br>232344131122421313444443331322221122434311224242424233421142442222134242232242224211g        | 1 |
| <i>Pueyo de Araguás</i> | <i>Pueyo de Araguás</i> | 334444421222131113333333331411332222133342114242133333221143134211114233444222444411222243331333131413224422<br>23224411113344331142144311112222331244331322424442221142114442222112244334244224211g        | 1 |
| <i>Rosal</i>            | <i>Rosal</i>            | 334414421222133313131323331411334422113342114242331311221333134213134233442242444411222343331113134413444342<br>222344131322221313441133131122443322433313224444422213421342444242132242234244224211g       | 1 |
| <i>Royeta de Baells</i> | <i>Royeta de Baells</i> | 23441422242331113133322131413134412131322134442331313121143114211114213444242144411422343131313331433424342<br>232344131323441311441133111122221112443313424444444411221144424242114444234242424211g        | 1 |
| <i>Royeta de Hoz</i>    | <i>Royeta de Hoz</i>    | 234414441222331311331322131413132211113344114422333311121344114411114233442244444211422344331111134433424342<br>232343131322221311421133331122421112434313424442422213421344442242134242334244224211g       | 1 |
| <i>Salenca</i>          | <i>Salenca</i>          | 334214421142333313131122334433134222133344112222133313221343134433134413442222444413222344331113114413424322<br>232344131323421313421143131122421322433313424442424213421342224242134242232244224211g       | 1 |
| <i>Seira</i>            | <i>Seira</i>            | 33441422124213331113112333441313222213332211444413131322114333423333221344224414441322224411131311111224342<br>333344131123423313421133111122221311434411444242444332213424244441342422224222213g           | 1 |
| <i>Sevillano</i>        | <i>Sevillano</i>        | 224411421142333311131123331433134222331342114442331333221133134411134213442244144213422244111133111413224422<br>22234413132322131142143313112222111243431122224244443344332244444213444222244222211g        | 1 |
| Verdal de Figols        | Verdal de Figols        | 23444422112211131133133313441333422211334211444233131322113311221311423344222244441322234333131111413444422<br>232344111122423311221143111122441322444313224242422211441144424442114244334442224213g        | 1 |
| <i>Verderola</i>        | <i>Verderola</i>        | 224414221222133313331323334433334212133342114422131333121343132213134413422242144433422344131311334413424342<br>332344131123221313421133111322421112434311424242224411221344424244114444232244224213g       | 1 |
| Verdial Tras-Os-Montes  | Verdial Tras-Os-Montes  | 2244112211421313131333331314331342221313441122421311132213431342131142134442421442132224311111134413424344<br>33234313112242111344144311134222131143441142222422213423342224242134442234244222211g          | 1 |
| Verdiell                | Verdiell                | 234414421244331133333231311111342221313421342423313332213441144131322134442421442114223431313131413444442<br>232244111333443313421143111122421312444313424244424211421344224242114244332242424213g          | 1 |
| <i>Verto</i>            | <i>Verto</i>            | 224444422242133313133323134413134222333344132242333313111144134433134213422242144411223344131311134413424344<br>2333441311234213114414431311222211224343134242424443322134422422211444233424222211g         | 1 |

**Table S4.** Diversity parameters of the 96 EST-SNPs genotyped in the 58 non-redundant genotypes. Number of non-redundant genotypes (N), Average number of observed alleles (Na), Number of effective alleles (Ne), Shannon's Information Index (I), Observed Heterozygosity (Ho), Expected Heterozygosity (He) and Minor Allele Frequency (MAF) were computed by GenAEx v.6.503. Polymorphic Information Content (PIC) was computed by MolMarker v.1.0 software.

| Locus          | N  | Na    | Ne    | I     | Ho    | He    | MAF   | PIC        |
|----------------|----|-------|-------|-------|-------|-------|-------|------------|
| EContig10374   | 58 | 2.000 | 1.708 | 0.605 | 0.379 | 0.414 | 0.293 | 0.32852908 |
| EContig10531   | 58 | 2.000 | 1.918 | 0.672 | 0.414 | 0.479 | 0.397 | 0.364      |
| EContig10539   | 58 | 2.000 | 1.708 | 0.605 | 0.483 | 0.414 | 0.293 | 0.32852908 |
| EContig10640   | 58 | 2.000 | 1.904 | 0.668 | 0.534 | 0.475 | 0.388 | 0.36212507 |
| EContig10787_1 | 58 | 2.000 | 1.334 | 0.417 | 0.293 | 0.250 | 0.147 | 0.21886146 |
| EContig1180_2  | 57 | 2.000 | 1.611 | 0.567 | 0.404 | 0.379 | 0.254 | 0.33279426 |
| EContig12203_1 | 58 | 2.000 | 1.918 | 0.672 | 0.448 | 0.479 | 0.397 | 0.36406941 |
| EContig12584   | 58 | 2.000 | 1.942 | 0.678 | 0.448 | 0.485 | 0.414 | 0.36745791 |
| EContig1263    | 58 | 2.000 | 1.399 | 0.460 | 0.345 | 0.285 | 0.172 | 0.24465524 |
| EContig1372_4  | 58 | 2.000 | 1.578 | 0.553 | 0.310 | 0.366 | 0.241 | 0.29916822 |
| EContig1634    | 58 | 2.000 | 1.728 | 0.612 | 0.466 | 0.421 | 0.302 | 0.33259561 |
| EContig1775_5  | 58 | 2.000 | 1.207 | 0.314 | 0.190 | 0.172 | 0.095 | 0.15693523 |
| EContig181_2   | 58 | 2.000 | 1.942 | 0.678 | 0.586 | 0.485 | 0.414 | 0.36745791 |
| EContig1813_3  | 58 | 2.000 | 1.999 | 0.693 | 0.569 | 0.500 | 0.491 | 0.37492567 |
| EContig1816_1  | 57 | 2.000 | 1.928 | 0.674 | 0.737 | 0.481 | 0.404 | 0.39043658 |
| EContig1839    | 58 | 2.000 | 1.942 | 0.678 | 0.483 | 0.485 | 0.414 | 0.36745791 |
| EContig188     | 58 | 2.000 | 1.422 | 0.473 | 0.362 | 0.297 | 0.181 | 0.25255935 |
| EContig1947_3  | 58 | 2.000 | 1.875 | 0.659 | 0.569 | 0.467 | 0.371 | 0.35771964 |
| EContig1962_1  | 58 | 2.000 | 1.687 | 0.597 | 0.500 | 0.407 | 0.284 | 0.32423754 |
| EContig1987_2  | 58 | 2.000 | 1.859 | 0.655 | 0.448 | 0.462 | 0.362 | 0.35525113 |
| EContig2068_2  | 57 | 2.000 | 1.990 | 0.691 | 0.614 | 0.498 | 0.465 | 0.39867472 |
| EContig2172_2  | 58 | 2.000 | 1.399 | 0.460 | 0.276 | 0.285 | 0.172 | 0.24465524 |
| EContig2305_1  | 58 | 2.000 | 1.787 | 0.632 | 0.517 | 0.441 | 0.328 | 0.34350615 |
| EContig2458_2  | 57 | 2.000 | 1.800 | 0.637 | 0.561 | 0.444 | 0.333 | 0.37069195 |
| EContig2514    | 58 | 2.000 | 1.985 | 0.689 | 0.534 | 0.496 | 0.457 | 0.37313519 |
| EContig2705_2  | 58 | 2.000 | 1.963 | 0.684 | 0.517 | 0.490 | 0.431 | 0.37019851 |
| EContig2785_2  | 58 | 2.000 | 1.953 | 0.681 | 0.500 | 0.488 | 0.422 | 0.36890791 |
| EContig2906_2  | 58 | 2.000 | 1.556 | 0.543 | 0.466 | 0.357 | 0.233 | 0.293381   |
| EContig2937_4  | 58 | 2.000 | 1.147 | 0.251 | 0.138 | 0.128 | 0.069 | 0.12017289 |
| EContig2950_2  | 58 | 2.000 | 1.334 | 0.417 | 0.155 | 0.250 | 0.147 | 0.21886146 |
| EContig298_1   | 58 | 2.000 | 1.995 | 0.692 | 0.603 | 0.499 | 0.474 | 0.374      |
| EContig2998    | 58 | 2.000 | 1.931 | 0.675 | 0.638 | 0.482 | 0.405 | 0.36584601 |
| EContig3075    | 58 | 2.000 | 1.578 | 0.553 | 0.448 | 0.366 | 0.241 | 0.29916822 |
| EContig3144_2  | 58 | 2.000 | 1.979 | 0.688 | 0.379 | 0.495 | 0.448 | 0.3723103  |
| EContig3225_1  | 58 | 2.000 | 1.824 | 0.644 | 0.586 | 0.452 | 0.345 | 0.34976198 |
| EContig3597_1  | 58 | 2.000 | 1.147 | 0.251 | 0.138 | 0.128 | 0.069 | 0.12017289 |
| EContig3889    | 58 | 2.000 | 1.998 | 0.693 | 0.517 | 0.499 | 0.483 | 0.37470256 |
| EContig3935_2  | 58 | 2.000 | 1.985 | 0.689 | 0.534 | 0.496 | 0.457 | 0.37313519 |
| EContig4112    | 58 | 2.000 | 1.942 | 0.678 | 0.586 | 0.485 | 0.414 | 0.36745791 |
| EContig4297_2  | 58 | 2.000 | 1.768 | 0.626 | 0.466 | 0.434 | 0.319 | 0.34007831 |
| EContig435_10  | 58 | 2.000 | 1.890 | 0.664 | 0.655 | 0.471 | 0.379 | 0.36000967 |
| EContig4380_1  | 58 | 2.000 | 1.985 | 0.689 | 0.707 | 0.496 | 0.457 | 0.37313519 |
| EContig4424_1  | 58 | 2.000 | 1.806 | 0.638 | 0.500 | 0.446 | 0.336 | 0.347      |
| EContig4490    | 58 | 2.000 | 1.511 | 0.521 | 0.362 | 0.338 | 0.216 | 0.28097009 |
| EContig460_6   | 58 | 2.000 | 1.985 | 0.689 | 0.431 | 0.496 | 0.457 | 0.37313519 |
| EContig465     | 58 | 2.000 | 1.904 | 0.668 | 0.500 | 0.475 | 0.388 | 0.36212507 |
| EContig4794    | 58 | 2.000 | 1.556 | 0.543 | 0.362 | 0.357 | 0.233 | 0.293381   |
| EContig504_6   | 57 | 2.000 | 1.611 | 0.567 | 0.474 | 0.379 | 0.254 | 0.33279426 |
| EContig5140    | 58 | 2.000 | 1.963 | 0.684 | 0.552 | 0.490 | 0.431 | 0.37019851 |

|               |               |              |              |              |              |              |              |              |
|---------------|---------------|--------------|--------------|--------------|--------------|--------------|--------------|--------------|
| EContig515_2  | 58            | 2.000        | 1.931        | 0.675        | 0.500        | 0.482        | 0.405        | 0.36584601   |
| EContig515_3  | 58            | 2.000        | 1.728        | 0.612        | 0.397        | 0.421        | 0.302        | 0.33259561   |
| EContig5168_5 | 58            | 2.000        | 1.859        | 0.655        | 0.483        | 0.462        | 0.362        | 0.35525113   |
| EContig5183   | 58            | 2.000        | 1.787        | 0.632        | 0.483        | 0.441        | 0.328        | 0.34350615   |
| EContig5193   | 58            | 2.000        | 1.334        | 0.417        | 0.293        | 0.250        | 0.147        | 0.21886146   |
| EContig5258   | 58            | 2.000        | 1.995        | 0.692        | 0.397        | 0.499        | 0.474        | 0.37433026   |
| EContig526_2  | 58            | 2.000        | 1.728        | 0.612        | 0.466        | 0.421        | 0.302        | 0.33259561   |
| EContig5399_1 | 58            | 2.000        | 1.787        | 0.632        | 0.655        | 0.441        | 0.328        | 0.34350615   |
| EContig5478_1 | 58            | 2.000        | 1.931        | 0.675        | 0.500        | 0.482        | 0.405        | 0.36584601   |
| EContig5674_1 | 58            | 2.000        | 1.890        | 0.664        | 0.621        | 0.471        | 0.379        | 0.36000967   |
| EContig6361   | 58            | 2.000        | 1.488        | 0.510        | 0.379        | 0.328        | 0.207        | 0.27432944   |
| EContig6479   | 58            | 2.000        | 1.355        | 0.432        | 0.310        | 0.262        | 0.155        | 0.22781663   |
| EContig6629   | 58            | 2.000        | 1.708        | 0.605        | 0.414        | 0.414        | 0.293        | 0.32852908   |
| EContig6851   | 57            | 2.000        | 1.566        | 0.547        | 0.333        | 0.361        | 0.237        | 0.32171088   |
| EContig695_2  | 58            | 2.000        | 1.991        | 0.691        | 0.448        | 0.498        | 0.466        | 0.37380811   |
| EContig698_3  | 58            | 2.000        | 1.979        | 0.688        | 0.517        | 0.495        | 0.448        | 0.3723103    |
| EContig6995   | 58            | 2.000        | 1.687        | 0.597        | 0.466        | 0.407        | 0.284        | 0.32423754   |
| EContig7442_2 | 58            | 2.000        | 1.971        | 0.686        | 0.466        | 0.493        | 0.440        | 0.37133198   |
| EContig749_1  | 58            | 2.000        | 1.979        | 0.688        | 0.552        | 0.495        | 0.448        | 0.3723103    |
| EContig8421_1 | 58            | 2.000        | 1.687        | 0.597        | 0.500        | 0.407        | 0.284        | 0.32423754   |
| EContig845_1  | 58            | 2.000        | 1.824        | 0.644        | 0.483        | 0.452        | 0.345        | 0.34976198   |
| EContig86     | 58            | 2.000        | 1.600        | 0.562        | 0.293        | 0.375        | 0.250        | 0.3046875    |
| EContig8662   | 58            | 2.000        | 1.999        | 0.693        | 0.569        | 0.500        | 0.491        | 0.37492567   |
| EContig894_1  | 58            | 2.000        | 1.942        | 0.678        | 0.379        | 0.485        | 0.414        | 0.36745791   |
| EContig8993_1 | 58            | 2.000        | 1.942        | 0.678        | 0.621        | 0.485        | 0.414        | 0.36745791   |
| EContig9136_3 | 58            | 2.000        | 1.748        | 0.619        | 0.483        | 0.428        | 0.310        | 0.33644337   |
| EContig9157_1 | 58            | 2.000        | 1.768        | 0.626        | 0.500        | 0.434        | 0.319        | 0.34007831   |
| EContig9302_3 | 58            | 2.000        | 1.806        | 0.638        | 0.397        | 0.446        | 0.336        | 0.34673232   |
| EContig9302_4 | 58            | 2.000        | 1.533        | 0.532        | 0.448        | 0.348        | 0.224        | 0.28731774   |
| EContig9677   | 58            | 2.000        | 1.985        | 0.689        | 0.638        | 0.496        | 0.457        | 0.37313519   |
| EContig9922_3 | 58            | 2.000        | 1.904        | 0.668        | 0.603        | 0.475        | 0.388        | 0.36212507   |
| IContig1226_3 | 58            | 2.000        | 1.890        | 0.664        | 0.586        | 0.471        | 0.379        | 0.36000967   |
| IContig125_1  | 56            | 2.000        | 1.577        | 0.552        | 0.411        | 0.366        | 0.241        | 0.34811481   |
| IContig1260_3 | 58            | 2.000        | 1.842        | 0.650        | 0.638        | 0.457        | 0.353        | 0.35260003   |
| IContig19_3   | 58            | 2.000        | 1.991        | 0.691        | 0.483        | 0.498        | 0.466        | 0.37380811   |
| IContig2083_2 | 58            | 2.000        | 1.806        | 0.638        | 0.431        | 0.446        | 0.336        | 0.34673232   |
| IContig2350_3 | 58            | 2.000        | 1.859        | 0.655        | 0.448        | 0.462        | 0.362        | 0.35525113   |
| IContig257_8  | 58            | 2.000        | 1.904        | 0.668        | 0.534        | 0.475        | 0.388        | 0.36212507   |
| IContig2640_3 | 58            | 2.000        | 1.998        | 0.693        | 0.655        | 0.499        | 0.483        | 0.37470256   |
| IContig2753_2 | 58            | 2.000        | 1.904        | 0.668        | 0.603        | 0.475        | 0.388        | 0.36212507   |
| IContig2783_3 | 58            | 2.000        | 1.963        | 0.684        | 0.690        | 0.490        | 0.431        | 0.37019851   |
| IContig2981_4 | 58            | 2.000        | 1.687        | 0.597        | 0.431        | 0.407        | 0.284        | 0.32423754   |
| IContig3160_2 | 58            | 2.000        | 1.998        | 0.693        | 0.655        | 0.499        | 0.483        | 0.37470256   |
| IContig353    | 58            | 2.000        | 1.578        | 0.553        | 0.414        | 0.366        | 0.241        | 0.29916822   |
| IContig3651   | 58            | 2.000        | 1.998        | 0.693        | 0.759        | 0.499        | 0.483        | 0.37470256   |
| IContig52_2   | 58            | 2.000        | 1.904        | 0.668        | 0.638        | 0.475        | 0.388        | 0.36212507   |
| IContig667_1  | 58            | 2.000        | 1.377        | 0.446        | 0.293        | 0.274        | 0.164        | 0.23641107   |
| <b>Mean</b>   | <b>57.917</b> | <b>2.000</b> | <b>1.777</b> | <b>0.615</b> | <b>0.479</b> | <b>0.427</b> | <b>0.341</b> | <b>0.334</b> |

**Table S5.** Matrix of admixture coefficients (Q-matrix) for K=4 indicating the ancestral populations of the 58 non-redundant genotypes. In the Q-matrix, red and green colors denote the highest and lowest values, respectively. Bold italic letters indicate new varieties.

| Genotypes                         | Location                                          | K1       | K2        | K3        | K4         | Average proportion<br>for the predominant<br>cluster | Predominant cluster<br>(K) |
|-----------------------------------|---------------------------------------------------|----------|-----------|-----------|------------|------------------------------------------------------|----------------------------|
| Alía                              | Artasona                                          | 0.9997   | 1.00E-04  | 1.00E-04  | 1.00E-04   | 0.84                                                 | K1                         |
| <i><b>Olivonero de Ayerbe</b></i> | Sta Eulalia, Ayerbe, Anies                        | 0.9997   | 1.00E-04  | 1.00E-04  | 1.00E-04   |                                                      |                            |
| Cerruda de Liesa                  | Abizanda, Benabente, Escanilla, Liesa             | 0.9997   | 1.00E-04  | 1.00E-04  | 1.00E-04   |                                                      |                            |
| Cerruda de Olvena                 | Artasona                                          | 0.9997   | 1.00E-04  | 1.00E-04  | 1.00E-04   |                                                      |                            |
| Gordal de Somontano               | Cregenzan, Salas Altas                            | 0.9997   | 1.00E-04  | 1.00E-04  | 1.00E-04   |                                                      |                            |
| Nación                            | Abizanda, Murillo, Buera, Estadilla               | 0.9997   | 1.00E-04  | 1.00E-04  | 1.00E-04   |                                                      |                            |
| Neral                             | Alquézar, Boltaña, Hoz, Pueyo                     | 0.9997   | 1.00E-04  | 1.00E-04  | 1.00E-04   |                                                      |                            |
| Rañinera                          | Guaso, Pueyo, Riglos, Sopeira                     | 0.9997   | 1.00E-04  | 1.00E-04  | 1.00E-04   |                                                      |                            |
| Salenca                           | Sopeira                                           | 0.9997   | 1.00E-04  | 1.00E-04  | 1.00E-04   |                                                      |                            |
| Seira                             | Albelda                                           | 0.983132 | 1.00E-04  | 1.00E-04  | 0.0166683  |                                                      |                            |
| Royal de Calatayud                | Ayerbe, Ipies, Huesca, Riglos, Sopeira, Barbastro | 0.944204 | 1.00E-04  | 0.0555958 | 1.00E-04   |                                                      |                            |
| Picudo de Labata                  | Labata                                            | 0.930474 | 0.0693261 | 1.00E-04  | 1.00E-04   |                                                      |                            |
| Mochuto                           | Alquézar                                          | 0.913723 | 0.0860767 | 1.00E-04  | 1.00E-04   |                                                      |                            |
| Verdal del Pallars                | Alquézar, Sopeira                                 | 0.884157 | 0.114227  | 1.00E-04  | 0.00151584 |                                                      |                            |
| Sevillano                         | Escanilla                                         | 0.863642 | 0.136158  | 1.00E-04  | 1.00E-04   |                                                      |                            |
| Biequeruda                        | Lascuarre                                         | 0.839013 | 0.160787  | 1.00E-04  | 1.00E-04   |                                                      |                            |
| Biecuda Capella                   | Capella                                           | 0.830869 | 1.00E-04  | 1.00E-04  | 0.168931   |                                                      |                            |
| <i><b>Escarío</b></i>             | Sopeira                                           | 0.816273 | 0.183527  | 1.00E-04  | 1.00E-04   |                                                      |                            |
| Albareta                          | Buera                                             | 0.783934 | 1.00E-04  | 1.00E-04  | 0.215866   |                                                      |                            |
| Piga                              | Estadilla                                         | 0.763218 | 1.00E-04  | 0.236582  | 1.00E-04   |                                                      |                            |
| Royeta de Abizanda                | Abizanda                                          | 0.738034 | 1.00E-04  | 0.181621  | 0.0802451  |                                                      |                            |
| Verderola                         | Escanilla                                         | 0.718103 | 1.00E-04  | 0.281697  | 1.00E-04   |                                                      |                            |
| Rosal                             | Labata                                            | 0.659947 | 1.00E-04  | 1.00E-04  | 0.339853   |                                                      |                            |
| <i><b>Buera_2</b></i>             | Buera                                             | 0.631715 | 1.00E-04  | 1.00E-04  | 0.368085   |                                                      |                            |
| <i><b>Picudo de Ibieca</b></i>    | Ibieca                                            | 0.602124 | 1.00E-04  | 0.397676  | 1.00E-04   |                                                      |                            |

|                             |                             |           |            |             |           |      |    |
|-----------------------------|-----------------------------|-----------|------------|-------------|-----------|------|----|
| Morcaire                    | Hoz                         | 0.563244  | 0.353835   | 0.0828207   | 1.00E-04  |      |    |
| Aceitunero-2249             | Abizanda                    | 0.502612  | 1.00E-04   | 1.00E-04    | 0.497188  |      |    |
| <b>Acebuche_1</b>           | Boltaña                     | 0.481049  | 0.0439177  | 1.00E-04    | 0.474933  |      |    |
| Hojiblanca                  | Binefar                     | 1.00E-04  | 0.9997     | 1.00E-04    | 1.00E-04  |      |    |
| Manzanilla de Sevilla       | Albelda, Peralta de Alcofea | 1.00E-04  | 0.9997     | 1.00E-04    | 1.00E-04  |      |    |
| Changlot Real               | Abizanda                    | 1.00E-04  | 0.911545   | 0.000665486 | 0.0876892 |      |    |
| Verdeal Tras-Os-Montes      | San Felices                 | 0.134324  | 0.825576   | 1.00E-04    | 0.0400001 |      |    |
| Picual                      | Labata                      | 0.267644  | 0.732156   | 1.00E-04    | 1.00E-04  | 0.71 | K2 |
| <b>Escanilla</b>            | Escanilla                   | 1.00E-04  | 0.630574   | 1.00E-04    | 0.369226  |      |    |
| <b>Minutera Boltaña</b>     | Boltaña                     | 1.00E-04  | 0.519329   | 0.480471    | 1.00E-04  |      |    |
| Verto                       | Berdegall                   | 0.238058  | 0.411866   | 1.00E-04    | 0.349977  |      |    |
| Castanero                   | Hoz                         | 0.304771  | 0.38962    | 1.00E-04    | 0.305509  |      |    |
| Dulcera                     | Sariñena                    | 1.00E-04  | 1.00E-04   | 0.9997      | 1.00E-04  |      |    |
| <b>Minutera de Labata</b>   | Labata                      | 1.00E-04  | 1.00E-04   | 0.9997      | 1.00E-04  |      |    |
| <b>Olivonero Alastuey</b>   | Sta Eulalia                 | 1.00E-04  | 1.00E-04   | 0.9997      | 1.00E-04  |      |    |
| <b>Minutera de Viña</b>     | Radiquero                   | 0.156012  | 1.00E-04   | 0.843788    | 1.00E-04  |      |    |
| Verdiell                    | Murillo                     | 1.00E-04  | 1.00E-04   | 0.786168    | 0.213632  | 0.74 | K3 |
| <b>Royeta de Hoz</b>        | Hoz                         | 0.409538  | 1.00E-04   | 0.590262    | 1.00E-04  |      |    |
| <b>Buera_1</b>              | Buera                       | 0.479888  | 1.00E-04   | 0.519912    | 1.00E-04  |      |    |
| <b>Panseña Fina</b>         | Alquézar                    | 0.416277  | 1.00E-04   | 0.468473    | 0.11515   |      |    |
| <b>Royeta de Baells</b>     | Baélls                      | 1.00E-04  | 0.382106   | 0.407385    | 0.210409  |      |    |
| Bolvino                     | Abizanda, Escanilla, Lamata | 1.00E-04  | 1.00E-04   | 1.00E-04    | 0.9997    |      |    |
| <b>Pueyo de Araguás</b>     | Pueyo                       | 1.00E-04  | 1.00E-04   | 1.00E-04    | 0.9997    |      |    |
| Negral de Bierge            | Bierge                      | 1.00E-04  | 1.00E-04   | 1.00E-04    | 0.9997    |      |    |
| Panseñera                   | Buera                       | 1.00E-04  | 1.00E-04   | 1.00E-04    | 0.9997    |      |    |
| Verdal de Figols            | Sopeira                     | 1.00E-04  | 1.00E-04   | 1.00E-04    | 0.9997    |      |    |
| <b>Olivonero de Murillo</b> | Murillo                     | 1.00E-04  | 1.00E-04   | 0.0361495   | 0.963651  |      |    |
| <b>Alquecerana</b>          | Alquézar                    | 0.0460156 | 1.00E-04   | 1.00E-04    | 0.953784  | 0.84 | K4 |
| Royeta de Asque             | Asque, Barbastro            | 1.00E-04  | 0.0537175  | 0.0346767   | 0.911506  |      |    |
| <b>Acebuche_2</b>           | Boltaña                     | 1.00E-04  | 0.213774   | 0.0765055   | 0.709621  |      |    |
| Bastarda                    | Asque                       | 0.32526   | 0.00959183 | 1.00E-04    | 0.665048  |      |    |
| Caspolina                   | Escanilla                   | 0.197243  | 0.326806   | 1.00E-04    | 0.475852  |      |    |
| <b>Olivera de Nadal</b>     | Colungo                     | 0.394291  | 0.18077    | 0.00184561  | 0.423093  |      |    |

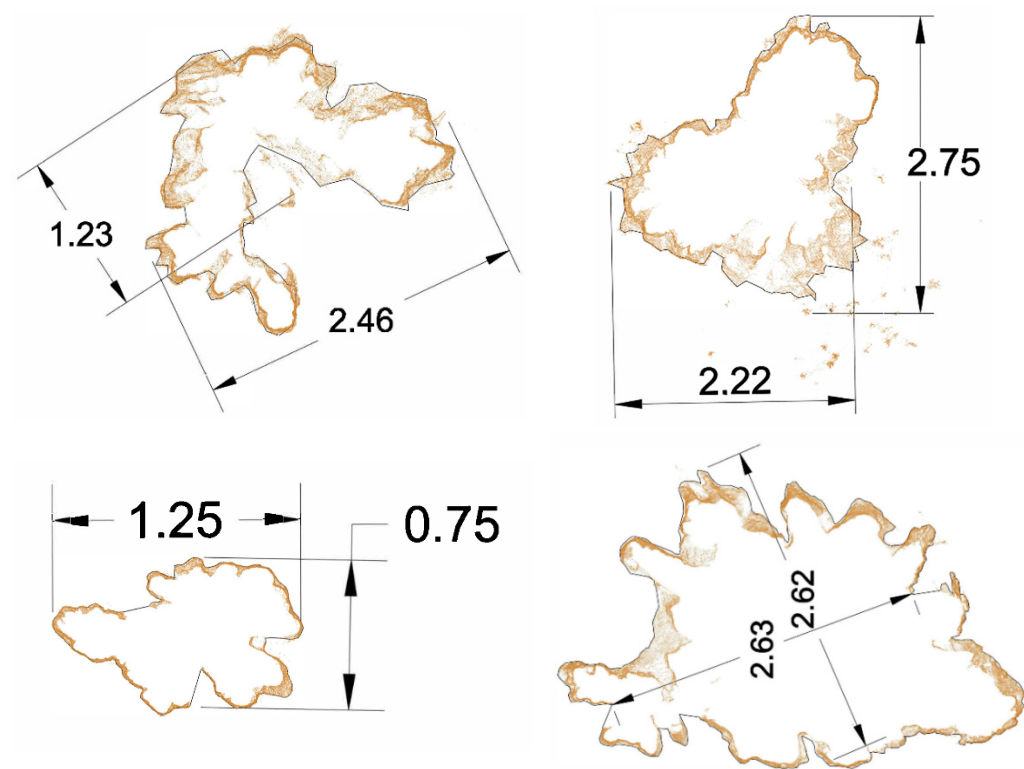

**Figure S1.** Examples of results from LIDAR scanning of the monumental olive trees shown in Figure 4: Tree cross-sections at 1.3 m above the soil level. Distances are indicated in meters.
